# Supplementary material
Source: Royal Society of Chemistry journal article supplement (doi:10.1039/d6dt00821f)
Supplement: d6dt00821f1.pdf [file d6dt00821f1.pdf]

## Synthesis of silver nanoparticles and their attachment to zinc oxide-iron oxide hybrid structure: analyte-mediated enhanced peroxidase-like activity for colorimetric detection

Melisew Tadele Alula<sup>a\*</sup>, Fahime Vetr<sup>b</sup>, Maximilian Gislary Mligo<sup>a</sup>, Peter Lemmens<sup>c</sup>

<sup>a</sup>Department of Chemical and Forensic Sciences, School of Pure and Applied Sciences, Botswana International University of Science and Technology, Plot 10071, Private Bag 16, Palapye, Botswana. E-mail: alulam@biust.ac.bw; Fax: +267-4900102; Tel: +267-76126741

<sup>b</sup>University of Guilan, Rasht, Iran

<sup>c</sup>Institute for Condensed Matter Physics and Lab. for Emergent Nanometrology (LENA), Braunschweig University of Technology, Mendelssohnsstr. 3, 38106, Braunschweig, Germany

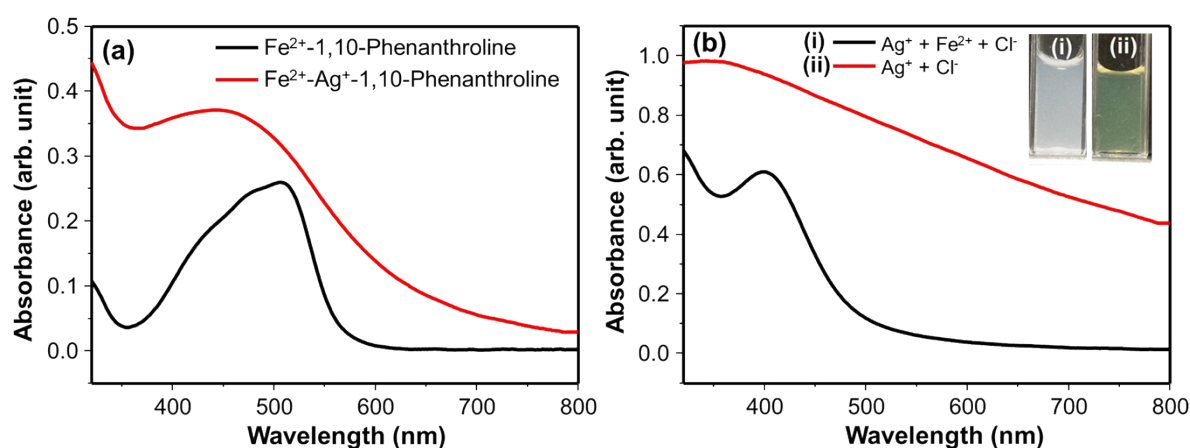

**Fig. S1** (a) UV/Visible absorption spectra of Fe<sup>2+</sup>-1,10-phenanthroline and Fe<sup>2+</sup>/Ag<sup>+</sup>-1,10-phenanthroline complexes. (b) Extinction spectra obtained when NaCl solution was mixed with Ag<sup>+</sup> or Ag<sup>+</sup>/Fe<sup>2+</sup> mixtures. The concentrations of Fe<sup>2+</sup>, Ag<sup>+</sup>, NaCl, and 1,10-phenanthroline were 2, 1, 2, and 2 mM respectively. The inset shows the pictures of the mixtures.

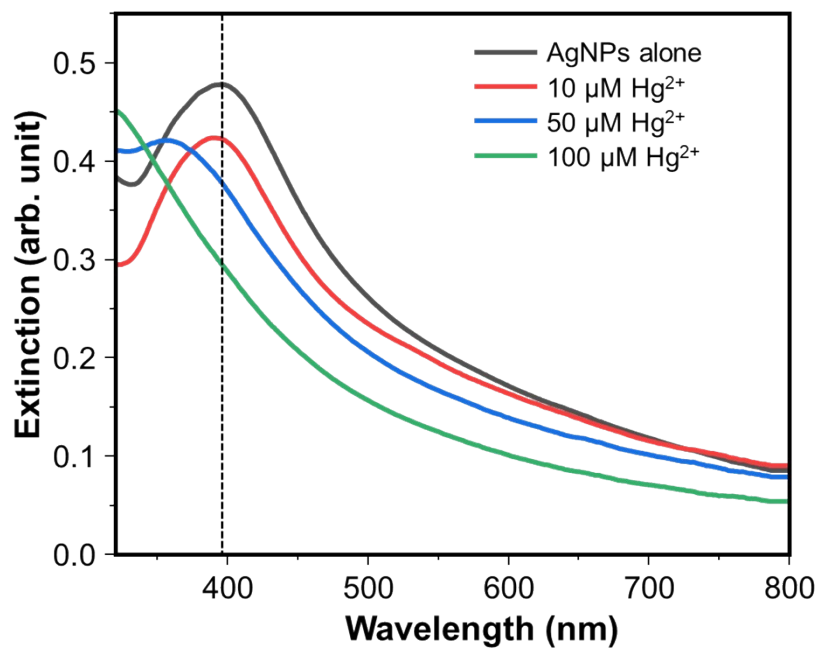

**Fig. S2** Extinction spectra of AgNPs colloids in the presence of different concentrations of Hg<sup>2+</sup>.

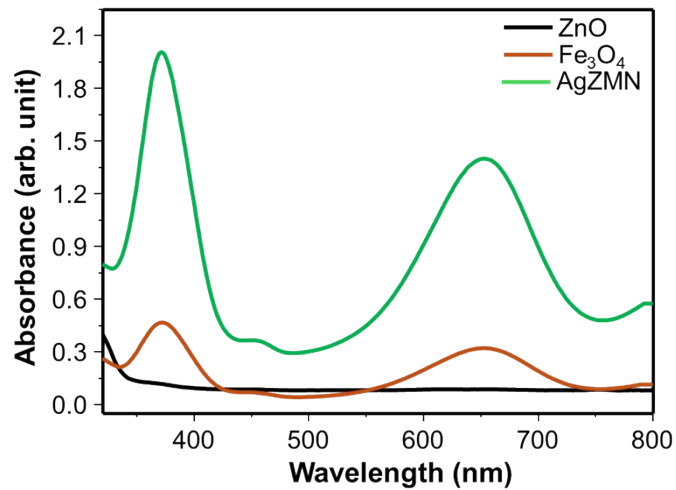

**Fig. S3** UV/Visible absorption spectra of TMB obtained using ZnO, Fe<sub>3</sub>O<sub>4</sub>, and AgZMN as catalysts for oxidation of TMB. The reaction conditions were ZnO or Fe<sub>3</sub>O<sub>4</sub> or AgZMN + TMB + H<sub>2</sub>O<sub>2</sub> + Hg<sup>2+</sup>. Acetate buffer of pH 4 was used for all reaction mixtures.

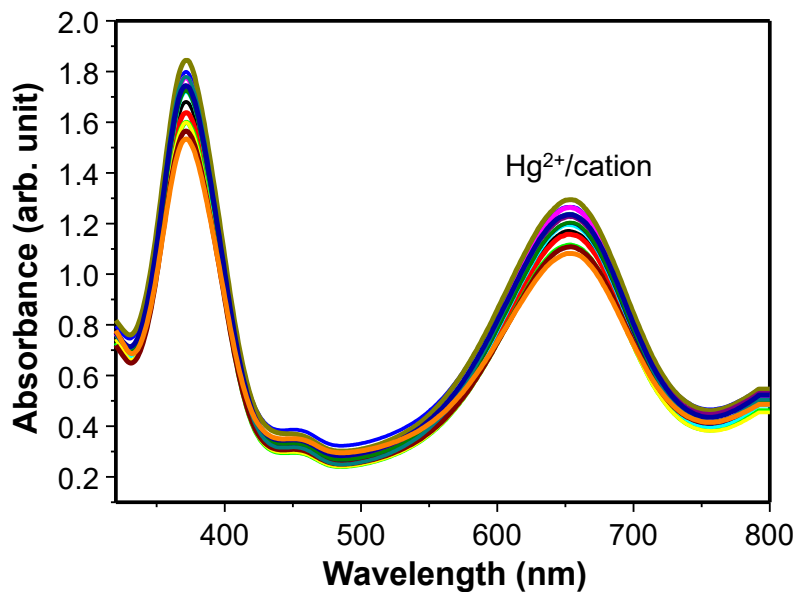

**Fig. S4** UV/Visible absorption spectra of oxTMB obtained from the peroxidase-like activity of AgZMN for the binary systems containing Hg<sup>2+</sup> and a cation. The tested cations include Ba<sup>2+</sup>, Ca<sup>2+</sup>, Co<sup>2+</sup>, Ni<sup>2+</sup>, Pb<sup>2+</sup>, Zn<sup>2+</sup>, Cu<sup>2+</sup>, Fe<sup>2+</sup>, Fe<sup>3+</sup>, Mg<sup>2+</sup>, Ag<sup>+</sup>, Na<sup>+</sup>, K<sup>+</sup>, and Cr<sup>6+</sup>.

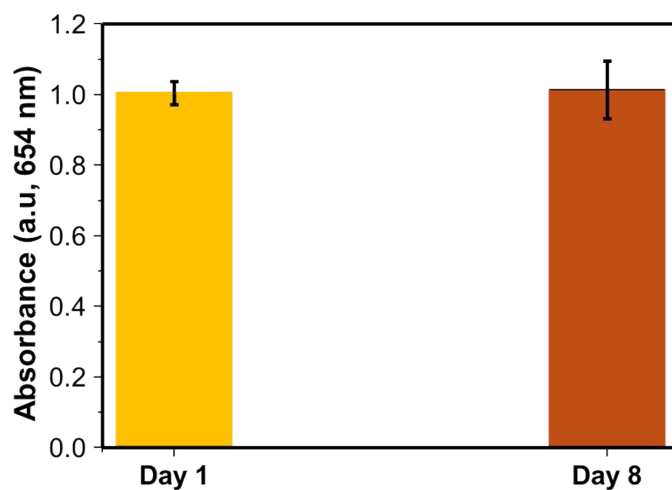

**Fig. S5** The absorbance intensity of oxTMB using AgZMN. The measurements were made at different days showing the stability of the nanozymes.

**Table S1** Kinetics parameters of AgZMN and previously reported nanozymes.

| No | Catalyst           | Substrate                     | Km (mM) | Vmax ( $\times 10^{-7}$ M/s) | Reference |
|----|--------------------|-------------------------------|---------|------------------------------|-----------|
| 1. | Os@ZIF-8 NCs       | H <sub>2</sub> O <sub>2</sub> | 0.516   | 2.21                         | 1         |
|    |                    | TMB                           | 0.926   | 2.5776                       |           |
| 2. | 10Fe-MnOx          | TMB                           | 0.15    | 0.403                        | 2         |
| 3. | GSH-AgNPs          | H <sub>2</sub> O <sub>2</sub> | 58.6    | 2.15                         | 3         |
|    |                    | TMB                           | 4.17    | 24.7                         |           |
| 4. | MnO <sub>2</sub>   | TMB                           | 0.246   | 2.19                         | 4         |
| 5. | CuFeS <sub>2</sub> | H <sub>2</sub> O <sub>2</sub> | 0.429   | 4.917                        | 5         |
|    |                    | TMB                           | 1.392   | 2.07                         |           |
| 6. | AgZMN              | H <sub>2</sub> O <sub>2</sub> | 56.92   | 92.79                        | This work |
|    |                    | TMB                           | 0.0661  | 32.51                        |           |

## References

1. Z. Wei, C. Jiang, J. Wang and Y. Chen, Synthesis of Os@ZIF-8 nanocomposites with enhanced peroxidase-like activity for detection of Hg<sup>2+</sup>, *RSC Adv.*, 2024, **14**, 9996-10003.
2. U. Duhan, A. Pan, R. Dubey, S. Layek, S. Kumar and T. Goswami, MOF-derived Fe-doped  $\delta$ -MnO<sub>2</sub> nanoflowers as oxidase mimics: chromogenic sensing of Hg<sup>2+</sup> and hydroquinone in aqueous media, *Dalton Trans.*, 2025, **54**, 9992-10002.
3. C. Jiang, Z. Bai, F. Yuan, Z. Ruan and W. Wang, A colorimetric sensor based on Glutathione- AgNPs as peroxidase mimetics for the sensitive detection of Thiamine (Vitamin B1), *Spectrochim. Acta A Mol. Biomol. Spectrosc.*, 2022, **265**, 120348.

4. N. Liang, X. Ge, Y. Zhao, L. Xia, Z.L. Song, R.M. Kong and F. Qu, Promoting sensitive colorimetric detection of hydroquinone and  $\text{Hg}^{2+}$  via ZIF-8 dispersion enhanced oxidase-mimicking activity of  $\text{MnO}_2$  nanozyme, *J. Hazard. Mater.*, 2023, **454**, 131455.
5. I. H. Nkuruma, N. Poloko, A. Asrat, A. Wheatley, P. Dinake and M. T. Alula, From mineral to sensing: Colorimetric determination of ciprofloxacin from water and food samples using natural chalcopyrite as nanozyme, *Food Chem.*, 2025, **496**, 146714.
